# Supplementary material for: Highly emissive poly(maleic anhydride-alt-vinyl pyrrolidone) with molecular weight-dependent and excitation-dependent fluorescence
Source: Royal Society of Chemistry journal article supplement (doi:10.1039/c7tc02381b), 2017-01-01
Supplement: c7tc02381b1.pdf [file c7tc02381b1.pdf]

## Electronic Supplementary Information

### **Highly Emissive Poly(maleic anhydride-*a/t*-vinyl pyrrolidone) with Molecular Weight-dependent and Excitation-dependent Fluorescence**

Cong Shang, Nan Wei, Hongmei Zhuo, Yumei Shao, Qin Zhang, Zexian Zhang, Huiliang Wang\*

Beijing Key Laboratory of Energy Conversion and Storage Materials, College of Chemistry, Beijing Normal University, Beijing 100875, P. R. China.

\*E-mail: wanghl@bnu.edu.cn

## Supporting Figures

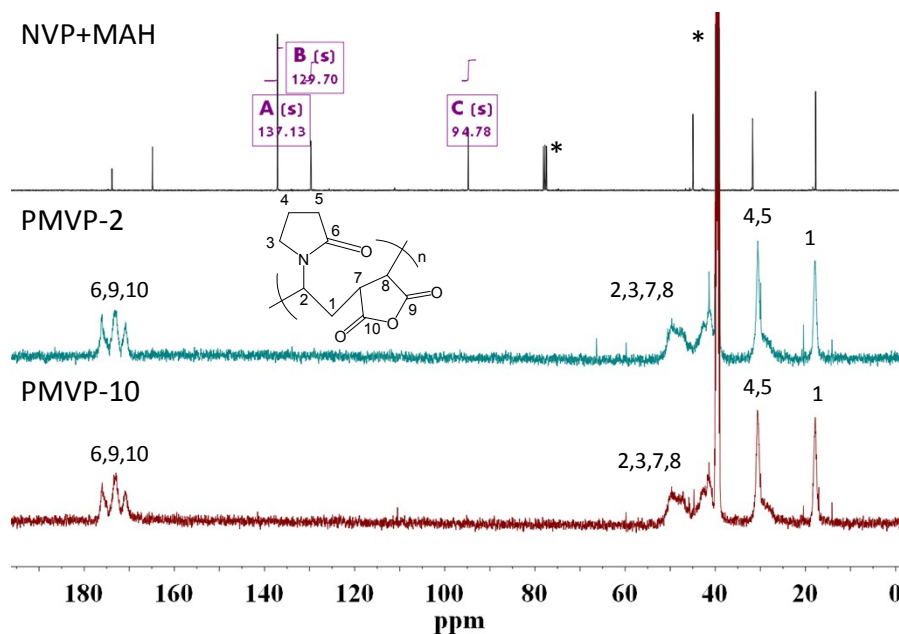

Figure S1  $^{13}\text{C}$  NMR spectra of PMVP-2 and PMVP-10 in *d*-DMSO

The  $^{13}\text{C}$  NMR spectra of PMVP-2 and PMVP-10 show that the chemical shifts corresponding to the C in C=C double bond of MAh ( $\delta = 137.13$ ) and NVP ( $\delta = 94.78$ ,  $129.70$ ) disappear, while broad peaks assigned to the C atoms in the copolymers appear, which indicates the formation of PMVPs.

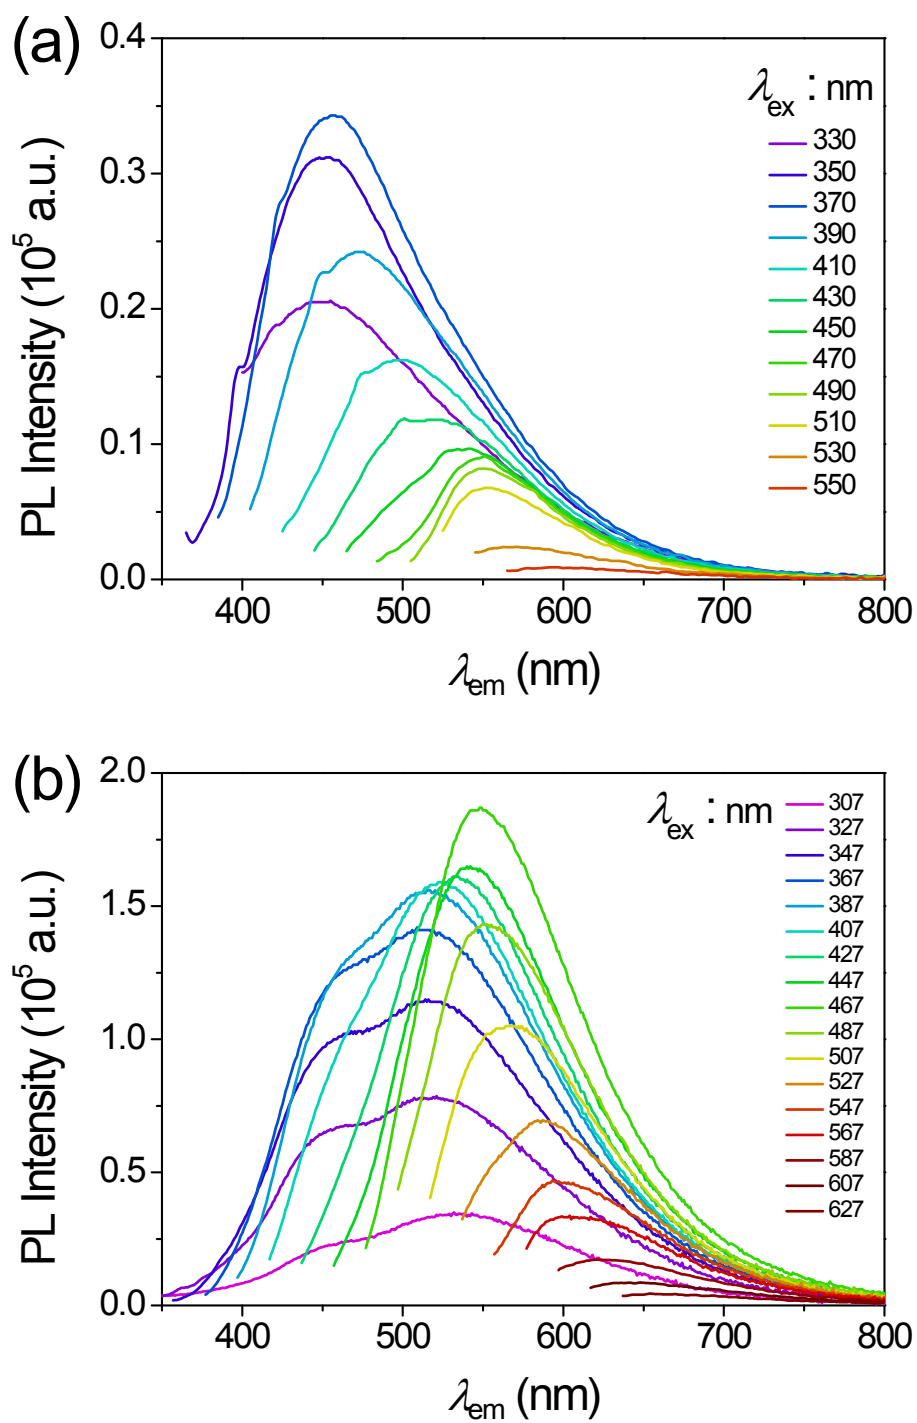

Figure S2. PL spectra of PMVP-2 (a) and PMVP-10 (b) in DMSO solutions. The excitation and emission slit widths are 5 nm and 1.5 nm, respectively.  $C_{PMVPs} = 5 \times 10^{-3}$  g/mL for the solutions.

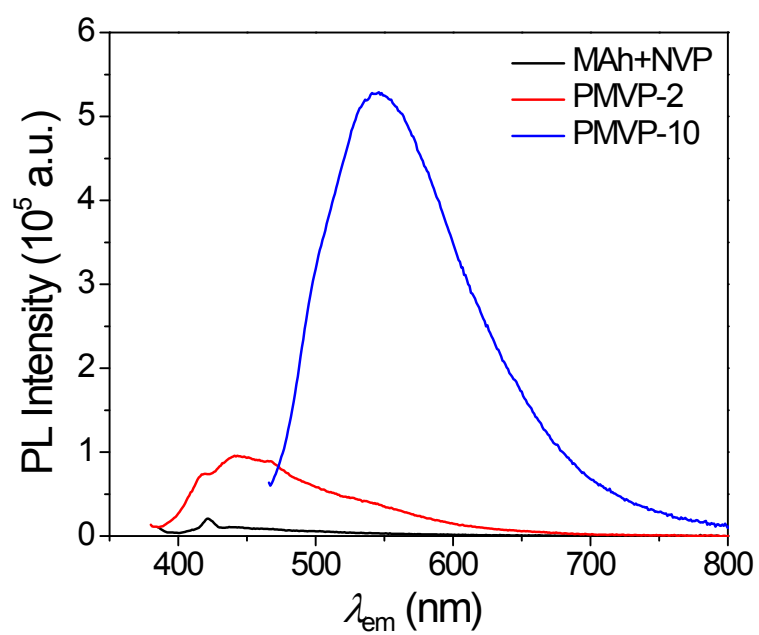

Figure S3. PL spectra of PMVP-2, PMVP-10 and NVP-MAh blend in DMSO solutions.  $C = 1 \times 10^{-3}$  g/mL,  $n(\text{MAh}) = n(\text{NVP})$ .

---

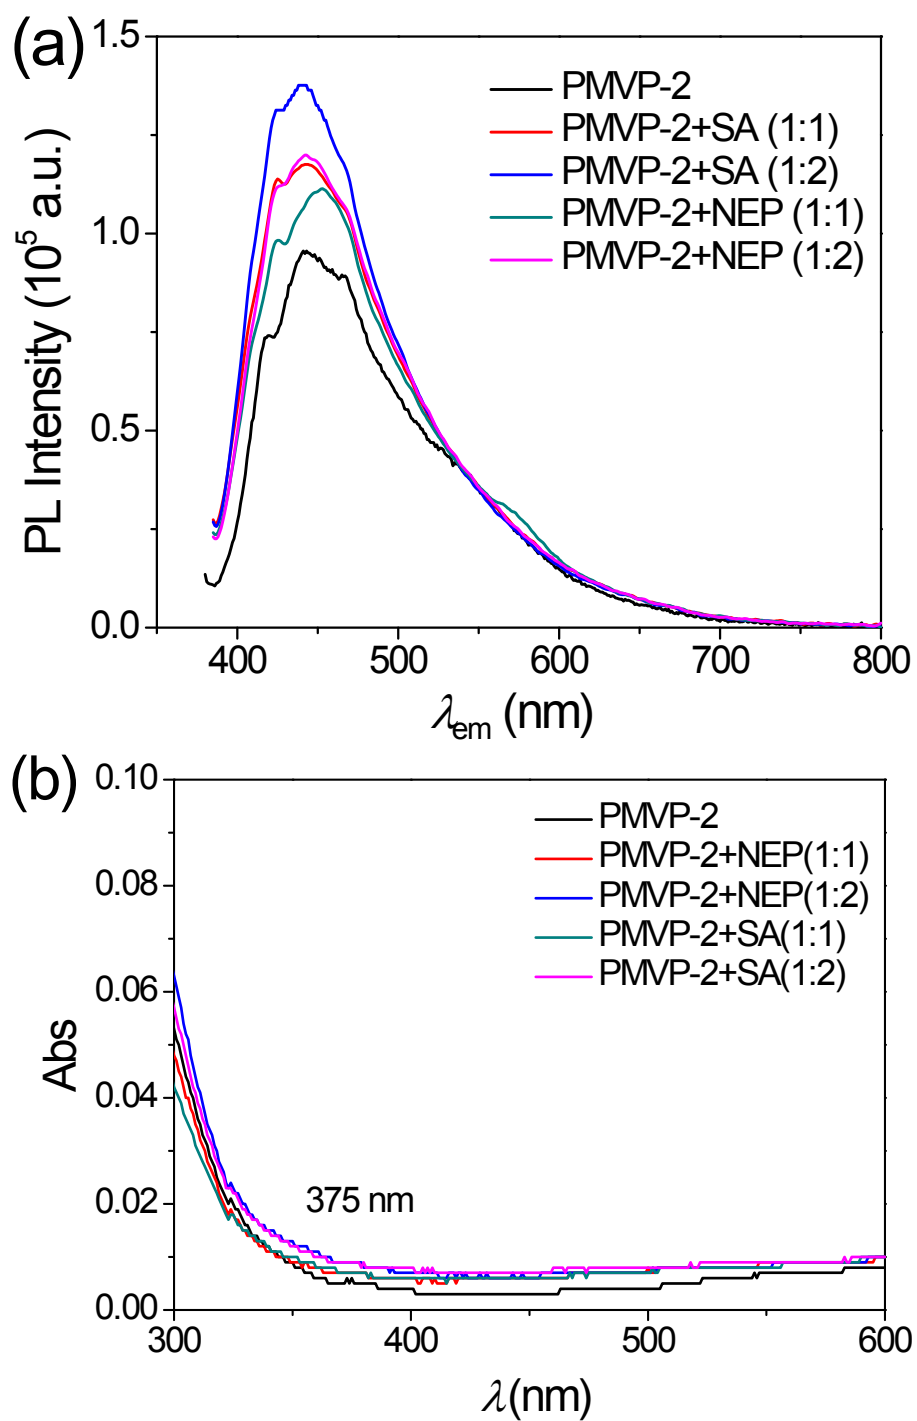

Figure S4. PL spectra (a) and UV-vis spectra (b) of PMVP-2 DMSO solutions added with succinic anhydride (SA) and *N*-ethyl pyrrolidone (NEP).  $C_{\text{PMVP-2}} = 1 \times 10^{-3}$  g/mL, and the mass ratios of SA and NEP to PMVP-2 are 1:1 or 2:1.  $\lambda_{ex} = 375$  nm (PMVP-2).

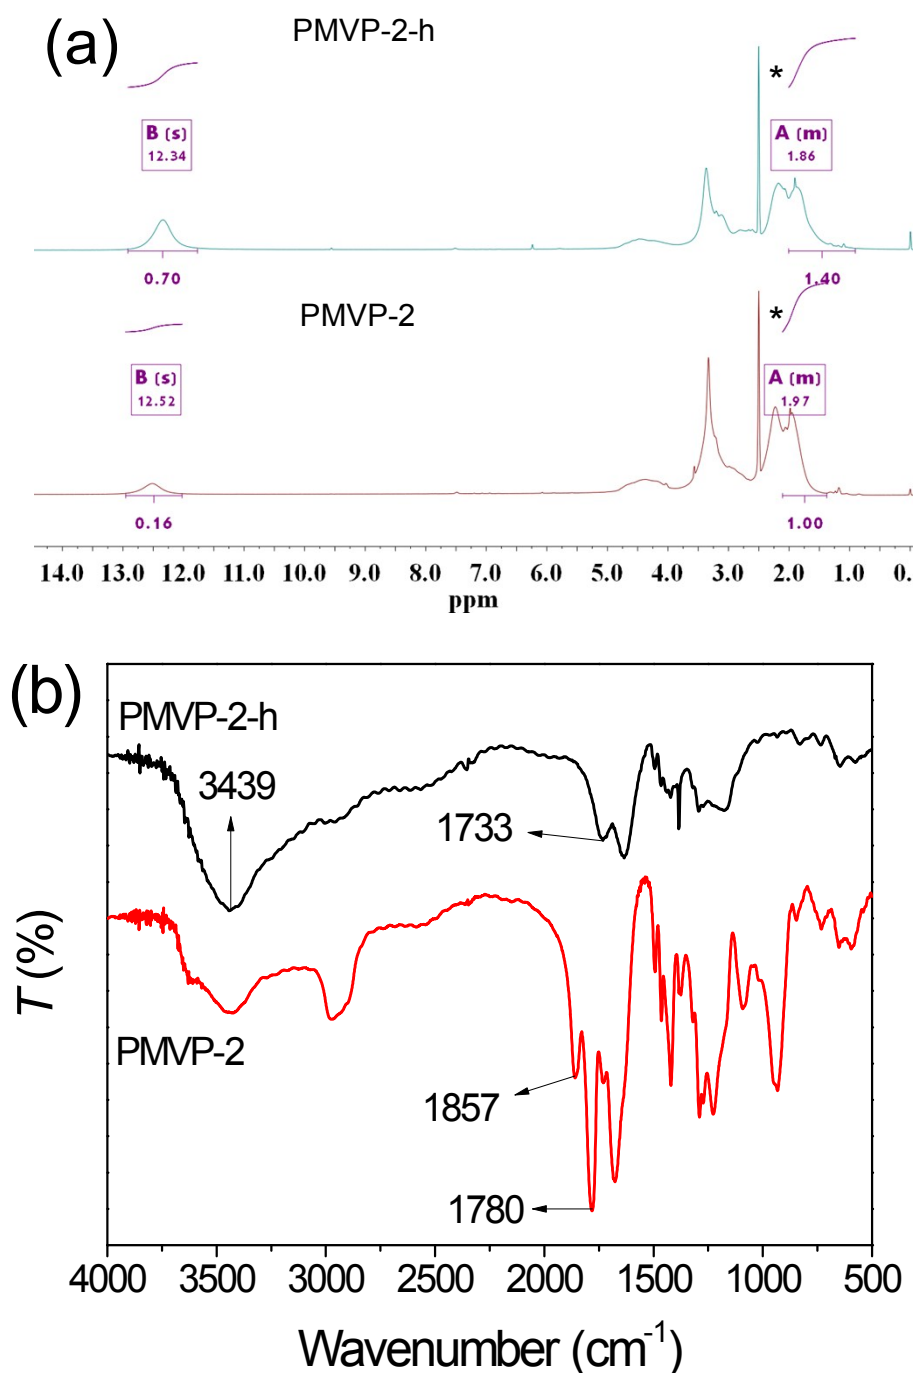

Figure S5.  $^1\text{H}$  NMR spectra (a) and FTIR spectra (b) of PMVP-2-h and PMVP-2.

Fig. S5a shows the  $^1\text{H}$  NMR spectra of both PMVP-2-h and PMVP-2. A strong peak corresponding to the chemical shift of the H in  $-\text{COOH}$  in the hydrolyzed copolymer PMVP-2-h appears at 12.34 ppm. Note that a weak peak attributed to the chemical shift of the H in  $-\text{COOH}$  also appears at 12.52 ppm in the original PMVP-2, due to the easy hydrolysis of anhydride even in contact with water in air. Fig. S5b shows the FTIR spectra of PMVP-2-h and PMVP-2, the spectrum of PMVP-2 shows the characteristic anhydride absorption bands at 1857 and 1780  $\text{cm}^{-1}$ , but these characteristic bands disappear in the spectrum of PMVP-2-h, indicating the hydrolysis of anhydride rings.

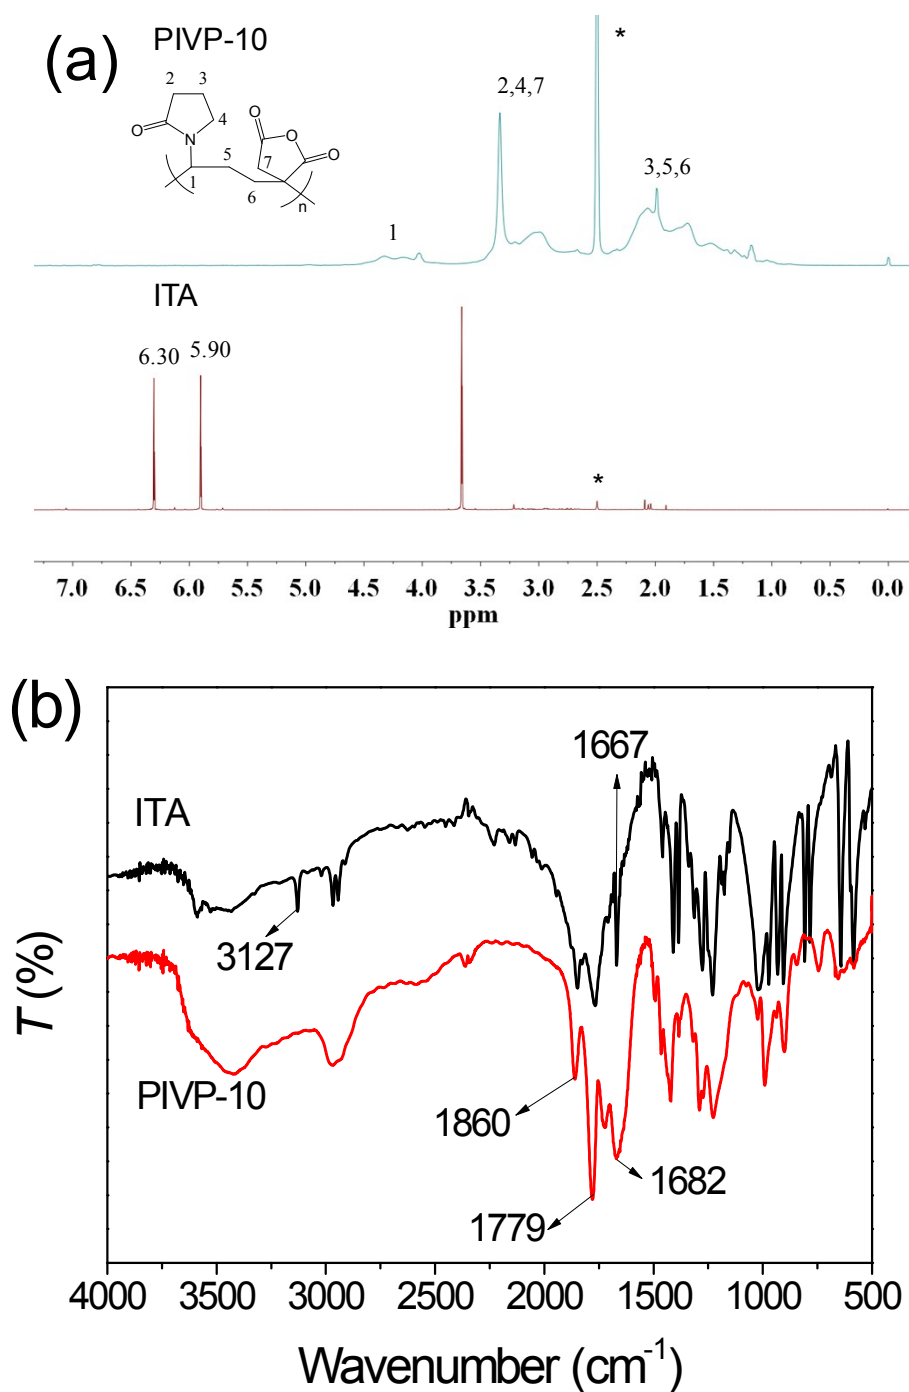

Figure S6. <sup>1</sup>H NMR spectra (a) and FTIR spectra (b) of ITA and PIVP-10.

The <sup>1</sup>H NMR spectrum shows that the chemical shifts corresponding to the H in C=C double bonds of ITA ( $\delta = 5.90, 6.30$ ) and NVP ( $\delta = 4.41, 6.97$ ) disappear, while broad peaks assigned to the H atoms in the copolymers appear, which indicates the formation of PIVP-10. Fig. S6b shows the FTIR spectra of PIVP-10, the characteristic anhydride absorption bands at 1860 and 1779 cm<sup>-1</sup> still exist, but the C=C absorption bands of ITA (3127 cm<sup>-1</sup>, 1667 cm<sup>-1</sup>) and NVP (3117 cm<sup>-1</sup>, 1625 cm<sup>-1</sup>) shown in the FTIR spectrum of the ITA and NVP disappear in the FTIR spectra of PIVP-10.
